1 Title: Extraction-free direct PCR from dried serum spots permits HBV genotyping and RAS

2 identification by Sanger and minION sequencing

3 Running title: Sequencing of hepatitis B virus directly from dried serum spot

4 Stuart Astbury<sup>a,b,c</sup>, Marcia Maria Da Costa Nunes Soares<sup>d</sup>, Emmanuel Peprah<sup>e</sup>, Barnabas

5 King<sup>b,e</sup>, Ana Carolina Gomes Jardim<sup>f</sup>, Jacqueline Farinha Shimizu<sup>f</sup>, Paywast Jalal<sup>g</sup>, Chiman H

6 Saeed<sup>h</sup>, Furat T Sabeer<sup>i</sup>, William L Irving<sup>b,c,e</sup>, Alexander W Tarr<sup>b,c,e\*</sup>, C Patrick McClure<sup>b,e</sup>

7

8 <sup>a</sup> Nottingham Digestive Diseases Centre, School of Medicine, University of Nottingham, UK

9 <sup>b</sup> NIHR Nottingham Biomedical Research Centre, Nottingham University Hospitals NHS Trust  
10 and the University of Nottingham, UK

11 <sup>c</sup> MRC/EPSRC Nottingham Molecular Pathology Node, University of Nottingham, UK

12 <sup>d</sup> Instituto Adolfo Lutz, Brazilian Ministry of Health, São Paulo, Brazil

13 <sup>e</sup> School of Life Sciences, University of Nottingham, UK

14 <sup>f</sup> Institute of Biomedical Sciences, Federal University of Uberlândia, Uberlândia, Brazil.

15 <sup>g</sup> Biology Department, Faculty of Science, University of Sulaimani, Sulaymaniyah, Iraq

16 <sup>h</sup> Medical Research Center, Hawler Medical University, Erbil, Iraq

17 <sup>i</sup> Central Public Health Laboratory, Erbil, Iraq

18 \*Corresponding author: [alex.tarr@nottingham.ac.uk](mailto:alex.tarr@nottingham.ac.uk)

19 **Word count (3,000 limit; excluding abstract, Methods, References, Tables and Figure**

20 **Legends): 2967**

21 [Abstract](#)

22

23 In order to achieve the commitment made by the World Health Organisation to eliminate  
24 viral hepatitis by 2030, it is essential that clinicians can obtain basic sequencing data for  
25 hepatitis B virus (HBV) infected patients. While accurate diagnosis of HBV is achievable in  
26 most clinical settings, genotyping and identification of resistance-associated substitutions  
27 (RAS) present a practical challenge in regions with limited healthcare and biotechnology  
28 infrastructure. Here we outline two workflows for generating clinically relevant HBV  
29 sequence data directly from dried serum spot (DSS) cards without DNA extraction using  
30 either Sanger, or the portable MinION sequencing platforms. Data obtained from the two  
31 platforms were highly consistent and allowed determination of HBV genotype and RAS. This  
32 is the first demonstration of MinION sequencing from DSS, illustrating the broad utility of  
33 this sequencing technology. We demonstrated the clinical application of this technology  
34 using sera sampled on DSS cards obtained from both Iraq and Brazil. The sample stability  
35 provided by DSS cards, combined with the rapid PCR and sequencing protocols will enable  
36 regional/national centres to provide information relevant to patient management. By  
37 providing viable workflows for both the Sanger and MinION sequencing platforms, which  
38 vary greatly in the infrastructure and expertise required, we demonstrate that MinION  
39 sequencing is a viable method for HBV genotyping in resource-limited settings. These  
40 workflows could also be applied to sequencing of other blood borne DNA viruses and  
41 bacterial pathogens.

42 Abstract word count: 230

43

44

## 45 Introduction

46 Hepatitis B virus (HBV) infects 257 million people worldwide and causes 887,000 deaths per  
47 year, many due to hepatocellular carcinoma (HCC) (1). A recent editorial in *Nature* described  
48 HBV as neglected, particularly in Sub-Saharan Africa, where around 6% of the population are  
49 infected and only one-tenth of children are vaccinated (2). There is an urgent need for  
50 screening and surveillance tools to assess HBV in low and middle-income countries (3). HBV  
51 displays a higher degree of diversity relative to other DNA viruses due to a complex and  
52 error prone replication cycle involving RNA intermediates, as such it has a mutation rate of  
53 around  $1.4\text{-}3.2 \times 10^{-5}$  mutations/site/year (4). There are many well-characterised mutations  
54 across the HBV genome, conferring resistance to therapy or an increase in replication  
55 efficiency (polymerase), immune and diagnostic test escape (S/pre-core), or an increase in  
56 tumorigenesis (reviewed in (5)).

57 Next generation sequencing (NGS) enables the study of a population of viral genomes within  
58 a single patient, as opposed to Sanger sequencing, which will theoretically provide a  
59 “consensus” sequence of the most abundant template. NGS platforms such as those  
60 established by Illumina rely on the use of short reads (max 250bp) which are assembled to  
61 form a contiguous sequence. Third generation sequencing platforms such as the Oxford  
62 Nanopore (ONT) MinION enable sequencing with theoretically no upper limit on read  
63 length, meaning entire viral genes or genomes can be sequenced in a single read. The  
64 MinION sequencer is also extremely portable and can be powered through a laptop,  
65 removing the need for a continuous power supply and enabling sequencing in locations  
66 without access to conventional lab facilities. The portable aspect of MinION sequencing has  
67 already been demonstrated to great effect during the Ebola outbreak in West Africa (6), and  
68 in tracking the spread of Zika virus in Brazil (7). Field application of the MinION platform has

69 been enhanced with recent advances including improved “R9.4” flow cells with increased  
70 accuracy and software such as Nanopolish (8), which works with signal-level data from the  
71 sequencer allowing generation of more accurate consensus sequences. However, despite  
72 the emerging potential of NGS technologies, Sanger sequencing remains the gold standard  
73 in clinical applications and represents the most accessible and affordable choice globally.

74

75 We thus aimed to combine both Sanger and MinION sequencing with dried serum spot  
76 (DSS) sampling, to develop a method by which HBV can be rapidly sequenced for both  
77 genotype as well as potential resistance-associated substitutions (RAS) that can be applied  
78 in regions without access to conventional sample storage or a cold chain. As this assay  
79 targets the overlapping ORFs containing S and the reverse transcriptase domain of the  
80 polymerase gene it can be used to genotype and detect resistance to antiretroviral  
81 treatment. HBV genomes are particularly well suited to direct PCR, enabling a clinical  
82 sample to be added directly to a PCR reaction with no extraction steps. However, with  
83 minor alterations this method can be applied to a wide range of viruses or bacterial  
84 pathogens.

85

86

87

88 **Methods**

89 **Samples:** Thirty HBV DNA-positive serum samples, with known viral load, were obtained  
90 from eight specialized centres in São Paulo State, Brazil, collected between July 2016 and  
91 April 2017. Samples varied in virus titre from  $6.35 \times 10^2$  to  $8.16 \times 10^8$  international units  
92 (IU)/mL. In addition, 70 serum samples identified as HBV DNA-positive were collected and  
93 processed at the Erbil Central Laboratory, Iraq, in 2017. Samples varied in virus titre from 22  
94 to  $9.4 \times 10^8$  IU/mL. The initial cohort of samples for sequence determination and primer  
95 optimisation were obtained from Nottingham University Hospitals NHS Trust, Nottingham,  
96 UK, and were held under ethical approval of the Nottingham Health Science Biobank. All  
97 samples were obtained for routine diagnostic investigation and surplus material was used in  
98 this study. Serum was stored at  $-70^\circ\text{C}$  prior to direct use or spotting in Nottingham and  $-20$   
99  $^\circ\text{C}$  in Brazil and Iraq.

100 **Viral load determination:** Viral load in the Brazilian samples was determined by RealTime  
101 HBV Amplification Kit (Abbott). In Iraq, DNA was extracted from 200 $\mu\text{L}$  serum using the EZ1  
102 Virus Mini Kit v2.0 (Qiagen), and viral load determined by Artus HBV PCR kit (Qiagen).

103 **Preparation of dried serum spot (DSS) cards:** A volume of 25-30  $\mu\text{L}$  serum was spotted onto  
104 a Whatman<sup>®</sup> Protein Saver<sup>™</sup> 903 Card (GE Healthcare), air-dried at room temperature for  
105 approximately 2 hours and stored at  $4^\circ\text{C}$  until further use. 25  $\mu\text{L}$  of serum typically  
106 saturated the 113.1  $\text{mm}^2$  (12 mm diameter) area demarcated on the DSS cards, thus a 3mm  
107 diameter punch (7.07  $\text{mm}^2$  area) represented approximately 1.5  $\mu\text{L}$  of serum. Between each  
108 sample a clean 3 $\text{mm}^2$  punch was made to prevent sample carryover, and a clean filter paper  
109 control was included in each PCR run.

110 **PCR:** HBV S gene-specific primers of HBV are shown in table 1. Two different modified  
111 polymerase enzymes were evaluated for this method: Hemo KlenTaq (NEB) and Phusion

112 Blood Direct (Thermo Fisher). Hemo KlenTaq reactions were set up as 25  $\mu$ L reactions  
113 containing 5  $\mu$ L Hemo KlenTaq reaction buffer, 0.2 mM dNTP (Sigma), 2  $\mu$ L Hemo KlenTaq  
114 enzyme, 0.3  $\mu$ M of each primer and 2  $\mu$ L serum. Phusion Blood Direct reactions were also  
115 set up as 25 $\mu$ L reactions containing 12.5  $\mu$ L 2x Phusion Blood Direct mastermix, 0.5  $\mu$ M of  
116 each primer, 8.5  $\mu$ L water and 2 $\mu$ L of serum. DSS reactions were prepared in the same way,  
117 with a 3 mm<sup>2</sup> punch used in place of serum and the volume adjusted to 25  $\mu$ L with water.  
118 Cycling conditions were as follows, for Phusion Blood Direct: 98 °C for 5 minutes, 55 cycles  
119 of [98 °C for 1 second, 50 °C for 5 seconds and 72 °C for 20 seconds/kb], and a final  
120 extension at 72 °C for 1 minute. Cycling conditions for Hemo KlenTaq were: 95 °C for 3  
121 minutes, 55 cycles of [95 °C for 20 seconds, 50 °C for 30 seconds and 68 °C for 2  
122 minutes/kb], and a final extension at 68 °C for 10 minutes. The sensitivity of this assay with  
123 different primer pairs was also tested by serially diluting a high viral titre sample ( $1.2 \times 10^7$   
124 IU/mL) logarithmically down to  $1.2 \times 10^1$  IU/mL.

125 Initially a well cited primer set (F1 and R1) generating a short amplicon in a conserved  
126 genomic sequence towards the end of the S gene (9) was used to probe the maximum  
127 sensitivity of direct PCR from serum and DSS derived from the control Nottingham cohort.  
128 This primer site is also situated within the RT domain of the polymerase gene, allowing for  
129 genotyping and determination of some RAS. A second widely used primer set (F2, F3, R2 and  
130 R3; (10)) was subsequently tested to generate larger amplicons and thus greater DNA  
131 sequence information. The sets were further tested in a variety of combinations to generate  
132 amplicons of intermediate length overlapping in genomic coverage.

133 **Sanger sequencing and phylogeny:** PCR-positive products were diluted 1:10 with water and  
134 couriered at ambient temperature for sequencing by a commercial service (Source

135 Bioscience, Nottingham, UK). Short products were sequenced with F1 primer only, and  
136 longer F1/R3 and F3/R1 products were sequenced with both F1 and R1 primers. These reads  
137 were assembled to produce a complete contiguous sequence covering PreS2/S. Sequences  
138 used for phylogenetic analysis were aligned using MUSCLE in MEGA X (11, 12), and  
139 maximum likelihood trees constructed using a General Time Reversible model in MEGA X.  
140 Samples containing deletions were excluded from the tree. Sequences were deposited in  
141 GenBank under accession numbers MK517481 – MK517524.

142 **MinION sequencing library preparation:** Three high titre ( $>10^7$  IU/mL) samples from both  
143 Brazil and Iraq cohorts were selected for sequence analysis. Barcoded samples were  
144 prepared for MinION sequencing using a two stage PCR approach and the SQK-LWB001  
145 library preparation kit. First round PCR was carried out as above, using 25  $\mu$ L Hemo KlenTaq  
146 reactions with 3 mm<sup>2</sup> punches from DSS. F4 and R4 primers were used as specified in table  
147 1. From this reaction, 1  $\mu$ L of product was then used as the template for a 50  $\mu$ L PCR  
148 containing 25  $\mu$ L 2x LongAmp HotStart Taq master mix, 1.5  $\mu$ L of barcoded primer mix  
149 (supplied by ONT) and 22.5  $\mu$ L nuclease free water. Products were then prepared according  
150 to the SQK-LWB001 kit protocol. Briefly, PCR products were bound to AMPure XP beads  
151 (Beckman Coulter) and washed with 70 % ethanol, before eluting in 10  $\mu$ L 10mM Tris-HCl  
152 (pH 8.0) with 50mM NaCl. Cleaned products were then quantified by Qubit using the dsDNA  
153 high sensitivity kit (Thermo Fisher). Based on the method developed by Quick *et al.* (7),  
154 amplicons were pooled to achieve a total of 0.3 pM input DNA per MinION flow cell,  
155 therefore for 1.3 kb amplicons this equates to ~260 ng total DNA. Following ligation of rapid  
156 sequencing adapters, the library was run for 48hrs on a MinION Mk II through a computer  
157 running MinKNOW 1.10.16 in Microsoft Windows followed by basecalling using Albacore

158 2.2.2. Adapter-trimmed sequences were uploaded to the NCBI Sequence Read Archive  
159 under project ID PRJNA521740.

160 **MinION sequencing analysis:** Basecalled reads were trimmed using Porechop 0.2.3 using  
161 high stringency settings (--discard\_middle and --require\_two\_barcodes) and retained when  
162 Porechop and Albacore barcode aligners were in agreement. NanoPlot was used to inspect  
163 read quality and length, and reads were filtered based on length using NanoFilt (13) to a  
164 minimum length of 1200 and maximum length of 1300 nucleotides.

165 Processed reads were used as the input for Canu (v1.7.1) (14), a *de novo* genome assembler  
166 optimised for use with long, error-prone reads. The same reads were subsequently aligned  
167 using Minimap2 (15) to their respective consensus sequences generated by Canu and  
168 manually inspected using IGV (Broad Institute) to ensure complete coverage and to inspect  
169 for significant structural variants. Alignments were further processed using Nanopolish  
170 v0.10.2 (8), using the Variants module and the --fix-homopolymers function to generate a  
171 corrected consensus sequence. A full description of the bioinformatics workflow used is  
172 included as supplementary data. As validation Sanger sequences were produced by  
173 sequencing amplicons with both F1 and R1 primers, these were used as the “gold standard”.  
174 Canu and Nanopolish consensus sequences were aligned with their respective Sanger contig  
175 using MEGA.

176 **Genotyping and variant calling:** For both Sanger and MinION sequence data genotypes  
177 were determined using the web-based tool HBV geno2pheno (16). Known HBV treatment  
178 resistance and immune escape variants were screened using the hepatitis B virus database  
179 (HBVdb (17)). Mutations against the genotype consensus reference sequences used in  
180 geno2pheno that were not flagged as clinically significant are provided in supplementary



181 table 1. For samples sequenced by MinION potential intra-host variants were screened for  
182 by aligning sequencing reads to the corresponding nanopolished consensus sequence for  
183 each sample and using the *variants* module within Nanopolish, with 0.1 set as the minimum  
184 frequency required to call a SNP.

185

## 186 Results

187 Primer analysis for PCR amplification of HBV from DSS.

188

189 Initially we assessed three previously described primer sets for amplification of regions of  
190 the HBV genome using Hemo KlenTaq polymerase. A known HBV-positive serum sample  
191 with viral load  $>10^7$  IU/mL was diluted 10-fold and spotted onto DSS cards. Using direct PCR  
192 of punched-out discs from these cards, HBV amplicons were obtained using all the primer  
193 pairs analysed (table 2). Amplification of the smallest product, using primers F1 and R1, was  
194 the most sensitive approach, amplifying a product from a sample containing as little as  $1 \times$   
195  $10^3$  IU/mL. Larger products (over 700 bp) were achieved using these primers in combination  
196 with the F3 and R3 primers down to  $10^4$  IU/mL. Subsequent investigation demonstrated that  
197 PCR amplification using Phusion Blood Direct polymerase allowed for increased sensitivity  
198 when amplifying small products, down to 600 IU/mL but gave little improvement in  
199 sensitivity when amplifying larger products (data not shown).

200 Sanger sequencing direct from DSS

201

202 Following this assessment, primer pairs F1/R1, F1/R3 and F3/R1 (figure 1) were used with  
203 Phusion Blood Direct polymerase for the analysis of 30 HBV-positive serum samples of  
204 defined viral load isolated in Brazil (table 3). Limited treatment information was available for  
205 some of the samples. Amplicons were achieved for all but 3 samples using the F1/R1 primer  
206 pair. The amplicon generated by this primer pair (281 bp) was sufficient to enable virus  
207 genotyping and limited detection of escape mutants by conventional Sanger sequencing.  
208 The 27 successfully genotyped samples divided into subtypes as follows: seven A1, two A2,  
209 one B1, two D1, two D1, two D2, nine D3, one F1 and three F2 (table 3).

210 It was not clear why three of the samples could not be amplified using the F1/R1 primer  
211 pair, but it is likely due in part to lower viral load as all three had viral loads of  $\sim 1 \times 10^3 - 1 \times$   
212  $10^4$  IU/mL (table 3). As the genotypes of these samples had not been previously determined  
213 it was not possible to confirm whether the primer pair had a lower sensitivity for some  
214 genotypes.

215 Successful amplification of the larger products using primer pairs F1/R3 and F3/R1 appeared  
216 to be associated with viral load (table 3). Both primer pairs were able to generate amplicons  
217 from samples of viral load  $>10^6$  IU/mL. F3/R1 displayed a higher sensitivity for genotype D  
218 samples as amplicons were achieved for samples Br13 and Br16 (viral loads  $5.99 \times 10^5$  and  
219  $2.58 \times 10^5$  IU/mL, respectively), although no amplicon was obtained for the higher viral load  
220 sample Br12 ( $9.41 \times 10^5$  IU/mL).

#### 221 Genotyping and RAS characterisation

222  
223 The amplicon produced from the F1/R3 primers permitted Sanger sequencing across aa 169  
224 to aa 250 of the reverse transcriptase (RT) domain of the Pol gene (figure 1, highlighted in  
225 red), allowing identification of resistance associated substitutions (RAS). A restricted section  
226 of this crucial RT RAS region can be sequenced with the amplicons produced from the other  
227 two primer pairs. Of those samples for which an amplicon was obtained, two samples  
228 contained known polymerase RAS. The dominant sequence amplified for Br3 contained  
229 V173L, L180M and M204V, which in isolation or combination confer resistance to  
230 lamivudine, entecavir and telbivudine. The predominant sequence in sample Br9 only  
231 contained the V173L mutation which, in isolation, is not associated directly with resistance  
232 to any of the clinically approved polymerase inhibitors.

233 Having refined the workflow for HBV genotyping and RAS-typing by Sanger sequencing from  
234 DSS of samples with known viral load, we applied it to a second sample set to assess the  
235 broader application of the workflow. Seventy serum samples isolated from HBV-positive  
236 patients in the Kurdistan Region of Iraq were processed onto DSS cards and shipped to the  
237 UK for analysis. Amplicons were obtained for 11 of the 70 samples and Sanger sequencing  
238 revealed they were all genotype D (table 4). Although successful amplification correlated  
239 with higher viral load (figure 2), the sensitivity of the amplification PCR for these samples  
240 was markedly lower compared to the Brazilian cohort. It is not clear why it was possible to  
241 generate amplicons for two Iraqi DSS samples of comparatively low viral load ( $1.15 \times 10^4$  and  
242  $2.58 \times 10^2$  IU/mL), or why three high viral load samples could not be amplified ( $2.28 \times 10^8$ ,  
243  $1.60 \times 10^7$  and  $1.42 \times 10^7$  IU/mL).

244 While no RT RAS were detected, three samples contained known sAg immune escape  
245 mutants, demonstrating that this process can provide clinically relevant sequence  
246 information from poorly characterised samples.

247 Samples from both cohorts demonstrated clustering by genotype when plotted on a  
248 maximum likelihood tree with respective genotype references from GenBank (figure 3).

249 *MinION sequencing direct from DSS*

250  
251 Having obtained clinically relevant sequence data by Sanger sequencing from DSS, we  
252 investigated whether comparable data could be obtained using MinION sequencing. Three  
253 samples each were selected from the Brazilian and Iraqi cohorts (Br1, Br2 and Br3; Iq2, Iq3  
254 and Iq4), that had been successfully amplified with all three primer pairs. Amplicons of  
255 1,274 bp were generated using primers F4 and R4, which were analysed in parallel by  
256 Nanopore sequencing. A total of 185,349 raw reads were obtained for the 6 samples,

257 ranging from 23869 to 41392 per barcode. Following adapter trimming and further filtering  
258 of erroneously long and short reads these counts ranged from 7676 to 11832 per barcode  
259 (table 5). A summary of raw sequencing reads acquired over time, and average quality score  
260 per read over time is included in figure 4.

261

#### 262 *Accurate consensus sequences generated by MinION Nanopore sequencing*

263 Consensus sequences were assembled using Canu. Following assembly, the only errors  
264 observed were single base deletions within homopolymers. These ranged from 5 to 12  
265 deletions within the total amplicon (table 6). Following a single round of Nanopolish all  
266 sequences were identical to their Sanger counterparts. Workflows for the two sequencing  
267 procedures are shown in figure 5. Upon receipt of samples it is feasible to obtain accurate  
268 sequences either by Sanger or MinION within 1-2 days.

269

#### 270 *Detection of minor variants with minION*

271 A number of putative minor variants were detected by aligning minION reads with the  
272 consensus sequence, the majority of which were filtered out by Nanopolish. Of the  
273 remaining variants samples Br1, Br2, Iq1, Iq3 and Iq4 contained sequences with the P217L  
274 polymorphism in sAg in around 18% of reads, which is associated with immune escape. Iq3  
275 also contained a L109P mutant in sAg in 16% of sequencing reads, associated with increased  
276 hydrophobicity. However, comparison with Sanger sequencing showed that neither of these  
277 base changes were visible as minor peaks on the electropherogram of the corresponding  
278 samples.

279

280

281

282

283

284

285

286

## 287 Discussion

288  
289 HBV has the capacity to exist in a host as a population of closely related viruses (18). While  
290 not displaying the extreme variability associated with RNA viruses, error-prone reverse  
291 transcription facilitates rapid adaptation to the host environment. As a consequence,  
292 resistance to antiviral therapies is common. Methods to both genotype and characterise  
293 RAS in parts of the world without access to conventional laboratory and sequencing facilities  
294 would be clinically beneficial. These techniques may become increasingly important in  
295 places such as sub-Saharan Africa, where antiretroviral programmes are in place for HIV  
296 treatment but HBV prevalence and development of resistance to drugs such as lamivudine is  
297 not accounted for (19, 20). As HIV mortality decreases and life expectancy increases, the  
298 development of chronic liver disease due to HBV infection will be of increasing concern.  
299 We have demonstrated that clinically useful HBV sequence data can be obtained from DSS,  
300 with a lower-limit of detection of approximately 600 IU/mL, using a relatively cost-effective  
301 method that requires no cold chain. Several of the RAS detected in this cohort are clinically  
302 significant. The Y100C mutant in the S region of HBsAg has been linked to false negative/low  
303 HBsAg tests (21), and appears to be common in our Brazilian cohort, being present in 5/10  
304 genotype A samples. More significantly, as it targets the RT domain of Pol, this method  
305 allows characterisation of drug resistance markers, which is potentially valuable in countries  
306 where prescription of drugs known to select for HBV resistance is common. The V173L,  
307 L180M and M204V RAS detected in the polymerase gene indicate resistance to the  
308 nucleoside analogues lamivudine and entecavir.  
309 Although our original methodology removed the need for a cold chain and required only  
310 basic or mobile laboratory facilities, a Sanger sequencer (or access to a sequencer-equipped

311 laboratory to where DSS/amplicons can be shipped) was still required. We therefore aimed  
312 to combine our DSS method with nanopore sequencing, increasing portability and to  
313 provide a method that can be rapidly deployed in resource-poor settings.

314 NGS datasets were successfully generated for all of the six of the samples tested. All  
315 samples demonstrated the characteristic error profile associated with nanopore  
316 sequencing, with frequent indels in homopolymers of 3 bases or more (22). In all cases  
317 these miscalls were removed using Nanopolish. These errors, which occur when voltage  
318 signal remains constant across homopolymer templates passing through the nanopore, will  
319 potentially become less of an issue with improved software interpolation or the  
320 development of new protein nanopores. In all cases the data was sufficiently accurate that  
321 the assembly generated by Canu, including indels, could be used to reliably and quickly  
322 genotype without any further processing, and with subsequent processing in Nanopolish  
323 produced sequences that were 100% identical to the sequence reads generated by Sanger  
324 sequencing. This method is therefore of use in situations where Sanger sequencing is  
325 unavailable and illustrates the utility of the MinION as a portable sequencer to determine  
326 the consensus of a virus population.

327 Sanger sequencing of HBV enables characterisation of a consensus sequence of theoretically  
328 the most abundant nucleotide at each position in a viral sequence within a sample.

329 Inspection of minor peaks on the electropherogram allows detection of minor sequence  
330 variants, down to a prevalence of around 20%, dependent on sample quality. As has been  
331 previously shown with HBV, next generation sequencing approaches allow characterisation  
332 of minor variants at a lower threshold (23-25). This information is potentially clinically  
333 useful, enabling earlier detection of resistant viruses, informing selection of appropriate



334 treatment regimens. Accurately determining these minor variants with NGS is  
335 methodologically difficult, as low concentrations of viral template often necessitate the use  
336 of PCR before sequencing. This may introduce bias from a range of sources. A recent  
337 investigation (26) suggested that if PCR primers are well designed an amplicon sequencing  
338 approach can be as reliable as unbiased metagenomic sequencing. However, the authors  
339 highlighted that in its current level of development, MinION sequencing is not appropriate  
340 for discovering novel, low-level intra-host sequence variants due to the high false-discovery  
341 rate. In our data, we applied a conservative variant calling approach by aligning all sequence  
342 reads to the consensus followed by variant calling using Nanopolish.

343 Sequencing HIV from dried blood spots using 454 pyrosequencing previously showed almost  
344 complete concordance with Sanger (27), but discrepancies appeared when characterising  
345 minor variants, particularly in low titre samples (28). Further experiments using more  
346 appropriate variant calling workflows, and a side-by-side comparison of DSS, direct serum  
347 and DNA extract would be required to study the potential effect of storing DSS samples on  
348 measures of diversity. The majority of candidate variants in our data were filtered out using  
349 Nanopolish, suggesting they could be false-positives caused by sequencer error. A variant  
350 that remained unfiltered was present in 5 of 6 samples (and therefore was not genotype  
351 specific), the mutation, P217L in S has previously been linked to diagnostic escape (29). The  
352 other minor variant, L109P in S, was present in a single sample (Iq1), and has been linked to  
353 an increase in hydrophobicity (30), but the significance of this phenotype has not been  
354 determined.

355 The MinION sequencing protocol described here followed the manufacturer's  
356 recommended protocol, using the standard 48-hour script in order to maximise read depth.

357 As demonstrated elsewhere (31), an alternative approach is to run the MinION for a shorter  
358 amount of time, flush the flow cell and add different samples. Larger barcode kits (up to 96)  
359 and custom barcodes can also be used. With this assay, setup can be adjusted to favour  
360 either assay throughput or read depth, prioritizing rapid consensus sequence generation or  
361 interrogation of intra-sample diversity. The metrics produced by the sequencer as shown in  
362 figure 4 can aid in this optimisation and be used to determine the optimum timepoint to  
363 stop a sequencing run and add more samples, in order to ensure efficient use of resources.  
364 Based on current prices, and after an initial outlay on basic lab equipment (PCR machine,  
365 pipettes), we estimate that accurate sequence data with the MinION could be obtained for  
366 as little as 20 GBP per sample. In comparison, a single Sanger read across the region studied  
367 in this paper will cost ~4 GBP, with larger regions requiring at least 2 reads for complete  
368 coverage.

369

370 One limitation of this method is the amount of template input required for successful  
371 amplification; obtaining long amplicons (in this case ~1247 bp) suitable for MinION  
372 sequencing required serum spots generated from samples with viral titre of at least  $10^6$ - $10^7$   
373 IU/mL. As expected, successful amplification was inversely correlated with viral load, making  
374 assays which involve amplifying all or most of S in a single amplicon only applicable to high  
375 titre samples. The combination of F4/R4 primers was chosen to take advantage of the long  
376 reads available with MinION sequencing. Increased sensitivity could be achieved using a  
377 PCR-tiling approach of two or more amplicons that are pooled before sequencing (as  
378 demonstrated with the much larger Zika genome (7)), or by scaling up reaction mixtures and  
379 using more DSS per reaction.

380 The workflow described in figure 6 is intended as a starting point for a diagnostic workflow,  
381 but, as indicated above, this method can be modified at each point to address specific  
382 clinical questions with different pathogens. In our application, dried serum spots were  
383 studied based on available samples, but the modified *Taq* enzymes used are suitable for use  
384 with whole blood, plasma or serum added directly to the PCR reaction. There is also the  
385 potential to apply this approach to other viruses where high-throughput testing is desired,  
386 for example improving existing workflows for cytomegalovirus (32).

387

388 In summary, we describe two approaches for rapid genotyping and RAS detection in  
389 hepatitis B virus, which are applicable in resource-limited settings and require little existing  
390 infrastructure. The results presented here demonstrate the utility of direct PCR enzymes  
391 and DSS together in a clinical context. To our knowledge this has not been previously  
392 described. We have also demonstrated, for the first time, that nanopore sequencing can be  
393 applied directly to samples amplified from serum spots. Reliable sequence data was  
394 generated using the MinION sequencer, removing the need for reliance on laboratory  
395 infrastructure. Although accurate consensus sequences can be generated, it is likely that  
396 both the software and hardware associated with nanopore sequencing will require  
397 improvement before this method will find routine use for detecting minor variants within a  
398 virus population.

399

400

401

402

403

404 Funding

405

406 Funding was provided by the Nottingham Molecular Pathology Node (MRC/EPSRC grant

407 MR/N005953/1) and the National Institute for Health Research (NIHR) Nottingham

408 Biomedical Research Centre.

409

410 Author contributions

411

412 CPM, AWT, WLI and SA designed the experiments; MMCNS, ACGJ, JFS, PJ, CHS and FTS

413 provided samples and associated clinical data and prepared DSS cards; SA, EP and CPM

414 carried out the experimental work; SA carried out nanopore sequencing and associated

415 bioinformatics; SA, BK, AWT and CPM analysed the data and drafted the manuscript; all

416 authors edited the manuscript.

417 Tables

418  
419  
420

| Primer name                | This study | Sequence (5'-3')                                | HBV genome position* |
|----------------------------|------------|-------------------------------------------------|----------------------|
| Outer plus <sup>(9)</sup>  | F1         | GATGTGTCTGCGGCGTTTTA                            | 376 - 395            |
| Outer minus <sup>(9)</sup> | R1         | CTGAGGCCCACTCCCATAGG                            | 656-637              |
| HBVP <sup>(10)</sup>       | F2         | TCATCCTCAGGCCATGCAGT                            | 3198-3217            |
| HBVM <sup>(10)</sup>       | R2         | GACACATTTCCAATCAATNGG                           | 989-970              |
| HBVZ <sup>(10)</sup>       | F3         | AGCCCTCAGGCTCAGGGCATA                           | 3085-3105            |
| HBV3 <sup>(10)</sup>       | R3         | CGTTGCCCKDGCAACSGGGTAAAGG                       | 1163-1140            |
| HBVZ-ONT                   | F4         | TTTCTGTTGGTGCTGATATTGCAGCCCTCAGGCTCAGGGCATA     | 3085-3105            |
| HBV3-ONT                   | R4         | ACTTGCCTGTCGCTCTATCTTCCGTTGCCCKDGCAACSGGGTAAAGG | 1163-1140            |

421

422 **Table 1: Primers used for the amplification of HBV.** F4 and R4 primers contain 22 bp  
423 sequences at the 5' end for MinION library preparation PCR. \*Numbering based upon  
424 HBVdb genotype A master strain X02763 (17).

425

| IU/mL HBV         | Primer pair       |                     |                   |                   |                   |                   |
|-------------------|-------------------|---------------------|-------------------|-------------------|-------------------|-------------------|
|                   | F1+R1<br>(281 bp) | F2+R2<br>(1,013 bp) | F1+R2<br>(614 bp) | F2+R1<br>(680 bp) | F1+R3<br>(788 bp) | F3+R1<br>(793 bp) |
| $1.2 \times 10^7$ | +                 | +                   | +                 | +                 | +                 | +                 |
| $1.2 \times 10^6$ | +                 | +                   | +                 | +                 | +                 | +                 |
| $1.2 \times 10^5$ | +                 | +                   | +                 | +                 | +                 | +                 |
| $1.2 \times 10^4$ | +                 |                     | +                 | +                 | +                 | +                 |
| $1.2 \times 10^3$ | +                 |                     |                   |                   | +                 | +                 |
| $1.2 \times 10^2$ |                   |                     |                   |                   |                   |                   |
| $1.2 \times 10^1$ |                   |                     |                   |                   |                   |                   |

426

427

428

429 **Table 2: HBV amplification success using different primer combinations.** HBV amplicon

430 sizes at different viral loads from DSS using a serially diluted high-titre HBV-positive sample.

431 Predicted amplicon size (in base pairs) is noted below primer pairing in brackets. +, indicates

432 successful amplification or single discrete band following analysis by agarose gel

433 electrophoresis.

434

| Sample | Viral load (IU/mL) | Therapy       | F1+R1 product | Genotype | F1+R3 product | RT domain RAS      | F3+R1 product | sAg escape mutants |
|--------|--------------------|---------------|---------------|----------|---------------|--------------------|---------------|--------------------|
| Br1    | 816,483,772        | No treatment  | Y             | A1       | Y             | -                  | Y             | Y100C              |
| Br2    | 389,547,123        | Peg-IFN       | Y             | A1       | Y             | -                  | Y             | Y100C              |
| Br3    | 241,145,063        | TDF, 3TC      | Y             | D2       | Y             | V173L, L180M M204V | Y             | -                  |
| Br4    | 33,875,365         | TDF, 3TC, EFV | Y             | A1       | Y             | -                  | Y             | Y100C              |
| Br5    | 21,807,740         | No treatment  | Y             | D3       |               |                    | Y             | -                  |
| Br6    | 6,219,005          | TDF           | Y             | D3       | Y             | -                  | Y             | -                  |
| Br7    | 5,843,310          | No treatment  | Y             | A1       | Y             | -                  | Y             | Y100C              |
| Br8    | 5,217,998          | nd            | Y             | D3       | Y             | -                  | Y             | -                  |
| Br9    | 3,166,098          | TDF           | Y             | F2       | Y             | V173L              |               | -                  |
| Br10   | 692,965            | nd            | Y             | A2       |               |                    |               |                    |
| Br11   | 193,271            | TDF           | Y             | F2       |               |                    |               |                    |
| Br12   | 94,152             | nd            | Y             | D3       |               |                    |               |                    |
| Br13   | 59,927             | TDF           | Y             | D3       |               |                    | Y             |                    |
| Br14   | 43,005             | TDF, 3TC      | Y             | A1       |               |                    |               | Y100C              |
| Br15   | 35,672             | TDF           | Y             | A1       |               |                    |               |                    |
| Br16   | 25,791             | TDF           | Y             | D2       |               |                    | Y             |                    |
| Br17   | 17,280             | nd            | Y             | F1       |               |                    |               |                    |
| Br18   | 16,697             | nd            | Y             | D3       |               |                    |               |                    |
| Br19   | 12,446             | 3TC           | Y             | D3       |               |                    |               |                    |
| Br20   | 12,196             | No treatment  | Y             | D1       |               |                    |               |                    |
| Br21   | 10,058             | TDF           | Y             | F2       |               |                    |               |                    |
| Br22   | 7,199              | TDF           |               | ng       |               |                    |               |                    |
| Br23   | 6,208              | No treatment  | Y             | D3       |               |                    |               |                    |
| Br24   | 4,091              | TDF           | Y             | B1       |               |                    |               |                    |
| Br25   | 2,884              | Peg-IFN       | Y             | A1       |               |                    |               |                    |
| Br26   | 2,431              | No treatment  | Y             | D1       |               |                    |               |                    |
| Br27   | 2,262              | No treatment  | Y             | A2       |               |                    |               |                    |
| Br28   | 1,069              | nd            |               | ng       |               |                    |               |                    |
| Br29   | 1,046              | No treatment  |               | ng       |               |                    |               |                    |
| Br30   | 635                | No treatment  | Y             | D3       |               |                    |               |                    |

435 **Table 3: Amplification of S/Pol gene from DSS of HBV-positive samples from Brazil,**  
436 **allowing genotyping and characterisation of RAS, is dependent on viral load.** Clinically  
437 significant RAS in the reverse transcriptase (RT) domain of the Polymerase open reading  
438 frame (ORF) are noted. TDF, tenofovir; 3TC, lamivudine; EFV, efavirenz; nd, no treatment  
439 data available; ng, not genotyped. Blank fields for primer pair products indicate no amplicon  
440 was generated.

441  
442

| Sample | Viral load (IU/mL) | F1+R1 product | Genotype | F1+R3 product | RT domain RAS | F3+R1 product | sAg escape mutants |
|--------|--------------------|---------------|----------|---------------|---------------|---------------|--------------------|
| lq1    | 745,867,080        | Y             | D1       | Y             | -             | Y             | -                  |
| lq2    | 480,199,200        | Y             | D1       | Y             | -             | Y             | -                  |
| lq3    | 369,094,710        | Y             | D1       | Y             | -             | Y             | -                  |
| lq4    | 361,383,300        | Y             | D1       | Y             | -             | Y             | -                  |
| lq5    | 330,190,500        | Y             | D1       | Y             | -             | Y             | -                  |
| lq6    | 17,996,700         | Y             | D1       | Y             | -             |               | P120S              |
| lq7    | 12,637,111         | Y             | D1       | Y             | -             | Y             | P120S              |
| lq8    | 3,393,900          | Y             | D3       | Y             | -             |               |                    |
| lq9    | 1,843,350          | Y             | D1       | Y             | -             |               | G145R              |
| lq10   | 11,514             | Y             | D1       | Y             | -             |               | Q101H,<br>Y143H    |
| lq11   | 258                | Y             | D1       | Y             | -             |               |                    |

443 **Table 4. Amplification of S/Pol gene from DSS of HBV-positive samples in Iraq cohort.**

444 Amplicons were generated from 11 of 71 DSS samples collected in the Kurdistan Region of  
445 Iraq. Clinically significant RAS in the reverse transcriptase (RT) domain of the Polymerase  
446 open reading frame (ORF) are noted.

447

| Sample | Raw reads | Adapter trimming | Length filtered |
|--------|-----------|------------------|-----------------|
| Br1    | 24105     | 13320            | 11272           |
| Br2    | 23868     | 12640            | 10309           |
| Br3    | 41392     | 14702            | 11832           |
| lq2    | 27860     | 11654            | 9572            |
| lq3    | 27478     | 12445            | 7676            |
| lq4    | 40646     | 13539            | 8979            |

448 **Table 5. MinION sequencing yields.** Raw reads are those assigned barcodes by Albacore

449 before any further quality control. Adapter trimmed reads are those exceeding a mean  
450 Phred score of 7 and processed by Porechop. Length filtered reads were processed by  
451 NanoFilt.

452

453



| <b>Sample</b> | <b>Mismatches between Canu assembly and Sanger</b> | <b>Mismatches between Nanopolish consensus and Sanger</b> |
|---------------|----------------------------------------------------|-----------------------------------------------------------|
| Br1           | 5                                                  | 0                                                         |
| Br2           | 6                                                  | 0                                                         |
| Br3           | 5                                                  | 0                                                         |
| lq2           | 9                                                  | 0                                                         |
| lq3           | 12                                                 | 0                                                         |
| lq4           | 6                                                  | 0                                                         |

454 **Table 6:** Agreement between minION sequenced samples and Sanger across the 1,274bp  
455 region studied.

456  
457  
458

## 459 **Supplementary data**

460

461 Bioinformatics workflow

462

463 Following basecalling using Albacore, the “pass” folder (reads exceeding a mean Phred score  
464 of 7) was used as the input for Porechop as follows:

465

```
466 porechop -i source_directory --discard_middle --require_two_barcodes
```

467

468 Filtering based on length was carried out in NanoFilt:

469

```
470 cat reads.fastq | nanofilt -l 1200 --maxlength 1300 > reads.filtered.fastq
```

471

472 Downsampled, filtered FASTQ files for each sample were then used as the input for Canu:

473

```
474 ./canu --nanopore-raw reads.filtered.fastq genomeSize=1300 stopOnReadQuality=false -d
```

```
475 canu_out -p sample-ID
```

476

477 This generates several candidate contigs, the contig with the highest number of reads used  
478 was verified using BLAST and taken forwards to the next step.

479

480 Reads were then aligned in Minimap2 to their respective contig generated using Canu:

481

```
482 minimap2 -ax map-ont canu_contig.fasta reads.filtered.fastq | samtools view -bS - |
```

```
483 samtools sort -o sample.minimap.sorted.bam
```

484

485 This alignment was then used to generate a polished consensus sequence using Nanopolish.

486 First the reads are indexed to match every read in the .fastq file with its corresponding raw

487 fast5 file (the original output of the minION sequencer):

488

```
489 nanopolish index -d fast5_directory -s sequencing_summary.txt reads.filtered.fastq
```

490

491 The alignment, reference contig and fastq for each sample were then used as the input for  
492 Nanopolish:

493

```
494 nanopolish variants --consensus --fix-homopolymers -b sample.minimap.sorted.bam -g
```

```
495 canu_contig.fasta -r reads.filtered.fastq -o sample.polished.consensus.vcf
```

496

497 This consensus .vcf file was then converted to standard .fasta format:

498

```
499 nanopolish vcf2fasta -g canu_contig.fasta sample.polished.consensus.vcf >
```

```
500 sample.polished.consensus.fasta
```

501

502 The output consensus sequence can then be checked against the original Canu contig, as

503 well as a Sanger contig from the same sample if available. These sequences can also be used

504 for genotyping and resistance typing against established reference sequences.

505

506 Intra-sample variants can be determined by aligning all reads to the Nanopolished  
507 consensus sequence or Sanger contig and using the *variants* function within Nanopolish to  
508 generate a .vcf file:

509

510 *nanopolish variants -b alignment.sorted.bam -g consensus.fasta -r sample.fastq -o*

511 *variants.vcf --min-candidate-frequency 0.1 --ploidy 1*

512

513

514

515

516

517

518

519

520

521

522

523

524

525

526

527

528

529

530

531

532

533

534

535

536

537

538

539

540

541

542

543

544

545

546

547

548

549

550

551

552

| ID   | Genotype | sAg mutants                                                          | Pol mutants                                                                                      |
|------|----------|----------------------------------------------------------------------|--------------------------------------------------------------------------------------------------|
| Br1  | A1       | Y100C, S207N                                                         | D7N, N122H, M129L, W153R, V163I, I253V, V278I, M336L, V341P                                      |
| Br2  | A1       | Y100C, S207N                                                         | D7N, N122H, M129L, W153R, V163I, I253V, V278I, M336L                                             |
| Br3  | D2       | T118A, E164D, I195M                                                  | Y45H, H126R, V173L, H126R, V173L, L180M, M204V, K270R                                            |
| Br4  | A1       | G44E, Y100C, S207N                                                   | N122H, M129L, W153R, V163I, I253V, V278I, M336L                                                  |
| Br5  | D3       | T127P                                                                | F122L, Q130P, Y135S                                                                              |
| Br6  | D3       | T127P                                                                | F122L, Q130P, Y135S, S176R                                                                       |
| Br7  | A1       | Y100C                                                                | S117P, N122H, M129L, W153R, V163I                                                                |
| Br8  | D3       | I110L, G112N, S114P, T125M                                           | N118T, R120K, I121F, F122A, N123D, Q130P, Y135N, S176R                                           |
| Br9  | F2       |                                                                      | N123D, M129L, S137T, V173L                                                                       |
| Br10 | A2       |                                                                      | D7A, I53V                                                                                        |
| Br11 | F2       |                                                                      | N123D, M129L, S137T, S176R                                                                       |
| Br12 | D3       | T127P, Y134N                                                         | F122L, H124N, Q130P, Y135S, V142E, S176R                                                         |
| Br13 | D3       | T127P                                                                | F122L, Q130P, Y135S                                                                              |
| Br14 | A1       | Y100C                                                                | N122H, N123D, M129L, W153R, V163I                                                                |
| Br15 | A1       | Y100C                                                                | N122H, M129L, W153R, V163I, S176R                                                                |
| Br16 | D2       | T118A, R122K, T127P, A128V, G159A, F161I                             | N118D, H126R, Y135S, Q149K, K168E, I169N, S176R                                                  |
| Br17 | F1       | S140T                                                                | N123D, M129L, S173T, F148Y, L151F                                                                |
| Br18 | D3       | T127P                                                                | F122L, Q130P, Y135S                                                                              |
| Br19 | D3       | T127P                                                                | F122L, Q130P, Y135S                                                                              |
| Br20 | D1       |                                                                      |                                                                                                  |
| Br21 | F2       | S140T                                                                | N123D, M129L, S173T, F148Y, S176R                                                                |
| Br22 | ng       |                                                                      |                                                                                                  |
| Br23 | D3       | T127P                                                                | F122L, Q130P, Y135S, S176R                                                                       |
| Br24 | B1       |                                                                      | N124D, N131D, S176R                                                                              |
| Br25 | A1       | Y100C                                                                | N122H, Y126H, M129L, W153R, V163I                                                                |
| Br26 | D1       | F93L, T127P                                                          | L102I, V112A, Y135S, S176R                                                                       |
| Br27 | A2       | T114S                                                                | N122I, D134N, W153R, S176R                                                                       |
| Br28 | ng       |                                                                      |                                                                                                  |
| Br29 | ng       |                                                                      |                                                                                                  |
| Br30 | D3       | G119A, C124S, T127P, Q129E, Y143N, P135T, G145E, T148S, I152L, P153T | L115V, F122L, T128S, Q130P, L132Q, D134H, Y135S, S137*, V142E, S143Y, H156Q, H160S, P161H, S176R |
| lq1  | D1       | T127P                                                                | S109P, Y135S                                                                                     |
| lq2  | D1       | T127P                                                                | Y135S                                                                                            |
| lq3  | D1       | T127P                                                                | Y135S                                                                                            |
| lq4  | D1       | T127P                                                                | Y135S                                                                                            |
| lq5  | D1       | T127P                                                                | M129L, Y135S, S176R                                                                              |
| lq6  | D1       | Q101H, P120S, T127P                                                  | T128I, M129L, Y135S, S176R                                                                       |
| lq7  | D1       | P120S, T127P                                                         | T128I, Y135S, S176R                                                                              |
| lq8  | D3       | T127P                                                                | Y135S                                                                                            |
| lq9  | D1       | S114A, T125M, G145R                                                  | F122R, H124N, Q130P, N131D, R153Q, S176R                                                         |
| lq10 | D1       | Q101H, T127P, Y134H, T140I                                           | M129L, Y135S, V142A, S176R                                                                       |
| lq11 | D1       | T127P                                                                | Y135S, S176R                                                                                     |

553 **Supplementary table 1: Mutations vs consensus reference sequences determined from**  
554 **Sanger sequencing in geno2pheno.**  
555  
556  
557  
558  
559  
560  
561  
562

## 563 References

- 564 1. WHO. 18 July 2018 2018. Hepatitis B virus Fact sheet, *on* World Health  
565 Organisation. <http://www.who.int/en/news-room/fact-sheets/detail/hepatitis-b>.  
566 Accessed
- 567 2. Graber-Stiehl I. 2018. The silent epidemic killing more people than HIV, malaria or  
568 TB. *Nature* 564:24.
- 569 3. Lemoine M, Eholie S, Lacombe K. 2015. Reducing the neglected burden of viral  
570 hepatitis in Africa: strategies for a global approach. *J Hepatol* 62:469-76.
- 571 4. Lazarevic I. 2014. Clinical implications of hepatitis B virus mutations: recent  
572 advances. *World J Gastroenterol* 20:7653-64.
- 573 5. Lapinski TW, Pogorzelska J, Flisiak R. 2012. HBV mutations and their clinical  
574 significance. *Adv Med Sci* 57:18-22.
- 575 6. Quick J, Loman NJ, Duraffour S, Simpson JT, Severi E, Cowley L, Bore JA, Koundouno  
576 R, Dudas G, Mikhail A, Ouedraogo N, Afrough B, Bah A, Baum JH, Becker-Ziaja B,  
577 Boettcher JP, Cabeza-Cabrero M, Camino-Sanchez A, Carter LL, Doerrbecker J,  
578 Enkirch T, Dorival IGG, Hetzelt N, Hinzmann J, Holm T, Kafetzopoulou LE, Koropogui  
579 M, Kosgey A, Kuisma E, Logue CH, Mazzarelli A, Meisel S, Mertens M, Michel J,  
580 Ngabo D, Nitzsche K, Pallash E, Patrono LV, Portmann J, Repits JG, Rickett NY, Sachse  
581 A, Singethan K, Vitoriano I, Yemanaberhan RL, Zekeng EG, Trina R, Bello A, Sall AA,  
582 Faye O, et al. 2016. Real-time, portable genome sequencing for Ebola surveillance.  
583 *Nature* 530:228-232.
- 584 7. Quick J, Grubaugh ND, Pullan ST, Claro IM, Smith AD, Gangavarapu K, Oliveira G,  
585 Robles-Sikisaka R, Rogers TF, Beutler NA, Burton DR, Lewis-Ximenez LL, de Jesus JG,  
586 Giovanetti M, Hill SC, Black A, Bedford T, Carroll MW, Nunes M, Alcantara LC, Jr.,  
587 Sabino EC, Baylis SA, Faria NR, Loose M, Simpson JT, Pybus OG, Andersen KG, Loman  
588 NJ. 2017. Multiplex PCR method for MinION and Illumina sequencing of Zika and  
589 other virus genomes directly from clinical samples. *Nat Protoc* 12:1261-1276.
- 590 8. Loman NJ, Quick J, Simpson JT. 2015. A complete bacterial genome assembled de  
591 novo using only nanopore sequencing data. *Nat Methods* 12:733-5.
- 592 9. Brechtbuehl K, Whalley SA, Dusheiko GM, Saunders NA. 2001. A rapid real-time  
593 quantitative polymerase chain reaction for hepatitis B virus. *J Virol Methods* 93:105-  
594 13.
- 595 10. PHE. 2007. Hepatitis B (HBV): Genotyping protocol, *on* Public Health England.  
596 <https://www.gov.uk/government/publications/hepatitis-b-hbv-genotyping-protocol>.  
597 Accessed 30 Oct 2007.
- 598 11. Kumar S, Stecher G, Li M, Niyaz C, Tamura K. 2018. MEGA X: Molecular Evolutionary  
599 Genetics Analysis across Computing Platforms. *Mol Biol Evol* 35:1547-1549.
- 600 12. Edgar RC. 2004. MUSCLE: multiple sequence alignment with high accuracy and high  
601 throughput. *Nucleic Acids Research* 32:1792-1797.
- 602 13. De Coster W, D'Hert S, Schultz DT, Cruts M, Van Broeckhoven C. 2018. NanoPack:  
603 visualizing and processing long-read sequencing data. *Bioinformatics* 34:2666-2669.
- 604 14. Koren S, Walenz BP, Berlin K, Miller JR, Bergman NH, Phillippy AM. 2017. Canu:  
605 scalable and accurate long-read assembly via adaptive k-mer weighting and repeat  
606 separation. *Genome Res* 27:722-736.
- 607 15. Li H. Minimap2: pairwise alignment for nucleotide sequences. *Bioinformatics*  
608 doi:10.1093/bioinformatics/bty191.

- 609 16. Beggel B, Neumann-Fraune M, Doring M, Lawyer G, Kaiser R, Verheyen J, Lengauer T.  
610 2012. Genotyping hepatitis B virus dual infections using population-based sequence  
611 data. *J Gen Virol* 93:1899-907.
- 612 17. Hayer J, Jadeau F, Deléage G, Kay A, Zoulim F, Combet C. 2013. HBVdb: a knowledge  
613 database for Hepatitis B Virus. *Nucleic Acids Research* 41:D566-D570.
- 614 18. McNaughton AL, D'Arienzo V, Ansari MA, Lumley SF, Littlejohn M, Revill P,  
615 McKeating JA, Matthews PC. 2019. Insights From Deep Sequencing of the HBV  
616 Genome-Unique, Tiny, and Misunderstood. *Gastroenterology* 156:384-399.
- 617 19. Barth RE, Huijgen Q, Taljaard J, Hoepelman AI. 2010. Hepatitis B/C and HIV in sub-  
618 Saharan Africa: an association between highly prevalent infectious diseases. A  
619 systematic review and meta-analysis. *Int J Infect Dis* 14:e1024-31.
- 620 20. Matthews PC, Geretti AM, Goulder PJ, Klenerman P. 2014. Epidemiology and impact  
621 of HIV coinfection with hepatitis B and hepatitis C viruses in Sub-Saharan Africa. *J*  
622 *Clin Virol* 61:20-33.
- 623 21. Martin CM, Welge JA, Rouster SD, Shata MT, Sherman KE, Blackard JT. 2012.  
624 Mutations Associated with Occult Hepatitis B Virus Infection Result in Decreased  
625 Surface Antigen Expression In Vitro. *J Viral Hepat* 19:716-23.
- 626 22. Sárközy P, Molnár V, Fogl D, Szalai C, Antal P. 2017. Beyond Homopolymer Errors: a  
627 Systematic Investigation of Nanopore-based DNA Sequencing Characteristics Using  
628 HLA-DQA2. *Periodica Polytechnica Electrical Engineering and Computer Science*  
629 61:231-237.
- 630 23. Cao L, Wu C, Shi H, Gong Z, Zhang E, Wang H, Zhao K, Liu S, Li S, Gao X, Wang Y, Pei R,  
631 Lu M, Chen X. 2014. Coexistence of hepatitis B virus quasispecies enhances viral  
632 replication and the ability to induce host antibody and cellular immune responses. *J*  
633 *Virol* 88:8656-66.
- 634 24. Liu F, Chen L, Yu DM, Deng L, Chen R, Jiang Y, Chen L, Huang SY, Yu JL, Gong QM,  
635 Zhang XX. 2011. Evolutionary patterns of hepatitis B virus quasispecies under  
636 different selective pressures: correlation with antiviral efficacy. *Gut* 60:1269-77.
- 637 25. Margeridon-Thermet S, Shulman NS, Ahmed A, Shahriar R, Liu T, Wang C, Holmes SP,  
638 Babrzadeh F, Gharizadeh B, Hanczaruk B, Simen BB, Egholm M, Shafer RW. 2009.  
639 Ultra-deep pyrosequencing of hepatitis B virus quasispecies from nucleoside and  
640 nucleotide reverse-transcriptase inhibitor (NRTI)-treated patients and NRTI-naive  
641 patients. *The Journal of infectious diseases* 199:1275-1285.
- 642 26. Grubaugh ND, Gangavarapu K, Quick J, Matteson NL, De Jesus JG, Main BJ, Tan AL,  
643 Paul LM, Brackney DE, Grewal S, Gurfield N, Van Rompay KKA, Isern S, Michael SF,  
644 Coffey LL, Loman NJ, Andersen KG. 2019. An amplicon-based sequencing framework  
645 for accurately measuring intrahost virus diversity using PrimalSeq and iVar. *Genome*  
646 *Biol* 20:8.
- 647 27. Ji H, Li Y, Graham M, Liang BB, Pilon R, Tyson S, Peters G, Tyler S, Merks H,  
648 Bertagnolio S, Soto-Ramirez L, Sandstrom P, Brooks J. 2011. Next-generation  
649 sequencing of dried blood spot specimens: a novel approach to HIV drug-resistance  
650 surveillance. *Antivir Ther* 16:871-8.
- 651 28. Ji H, Li Y, Liang B, Pilon R, MacPherson P, Bergeron M, Kim J, Graham M, Van  
652 Domselaar G, Sandstrom P, Brooks J. 2013. Pyrosequencing dried blood spots reveals  
653 differences in HIV drug resistance between treatment naive and experienced  
654 patients. *PLoS One* 8:e56170.

- 655 29. Weinberger KM, Bauer T, Bohm S, Jilg W. 2000. High genetic variability of the group-  
656 specific a-determinant of hepatitis B virus surface antigen (HBsAg) and the  
657 corresponding fragment of the viral polymerase in chronic virus carriers lacking  
658 detectable HBsAg in serum. *J Gen Virol* 81:1165-74.
- 659 30. Baclig MO, Alvarez MR, Gopez-Cervantes J, Natividad FF. 2014. Unique surface gene  
660 variants of hepatitis B virus isolated from patients in the Philippines. *J Med Virol*  
661 86:209-16.
- 662 31. Mbala-Kingebeni P, Villabona-Arenas CJ, Vidal N, Likofata J, Nsio-Mbeta J, Makiala-  
663 Mandanda S, Mukadi D, Mukadi P, Kumakamba C, Djokolo B, Ayoub A, Delaporte E,  
664 Peeters M, Muyembe Tamfum JJ, Ahuka-Mundeke S. 2019. Rapid Confirmation of  
665 the Zaire Ebola Virus in the Outbreak of the Equateur Province in the Democratic  
666 Republic of Congo: Implications for Public Health Interventions. *Clin Infect Dis*  
667 68:330-333.
- 668 32. Koontz D, Dollard S, Cordovado S. 2019. Evaluation of rapid and sensitive DNA  
669 extraction methods for detection of cytomegalovirus in dried blood spots. *Journal of*  
670 *Virological Methods* 265:117-120.  
671  
672



673 Figures

674

675

676

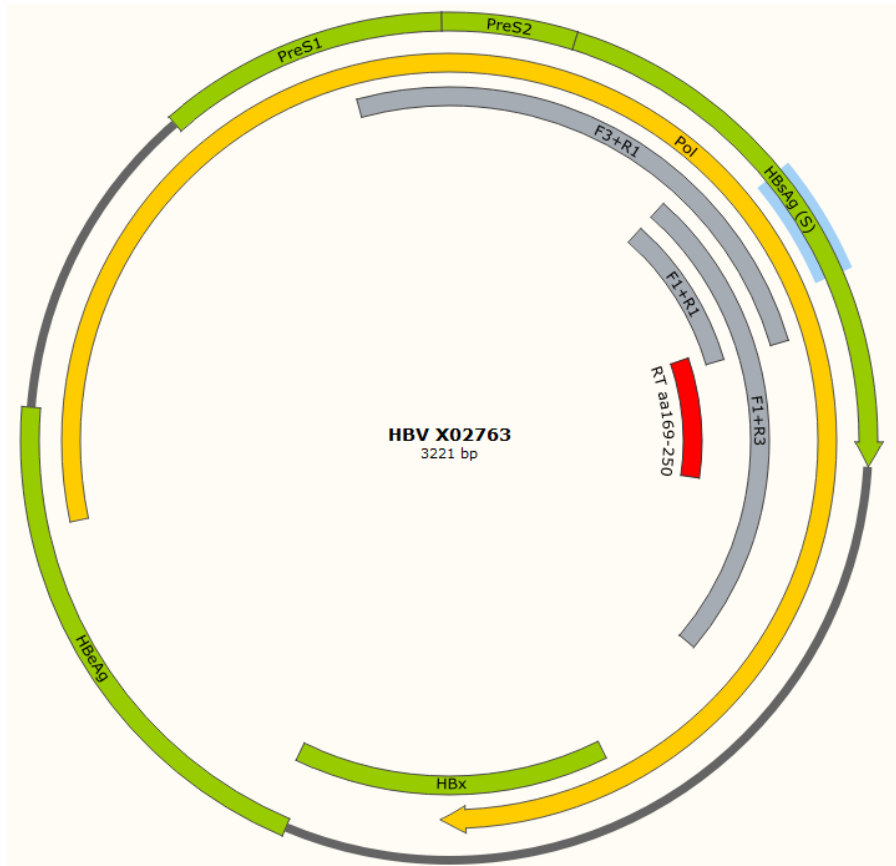

677

678 **Figure 1. Schematic of HBV PCR amplicons produced from cccDNA.** Regions covered by PCR

679 amplicons detailed in Table 2 are shown in grey. Overlapping ORFs in the HBV genome

680 (genotype A reference isolate X02763) are shown in green or yellow (polymerase gene).

681 Genome is represented as linear for clarity. F1+R1 amplicon is sufficient for genotyping and

682 limited detection of sAg escape mutants. The region of the reverse transcriptase domain

683 (RT) in which resistance associated substitutions (RAS) arise (aa169 – 250), shown in red, is

684 encompassed by the F1+R3 amplicon. The region in which known surface antigen (HBsAg)

685 immune/diagnostic escape mutants arise (aa100 – 147), highlighted in blue, is covered by all

686 three amplicons.

687

688

689

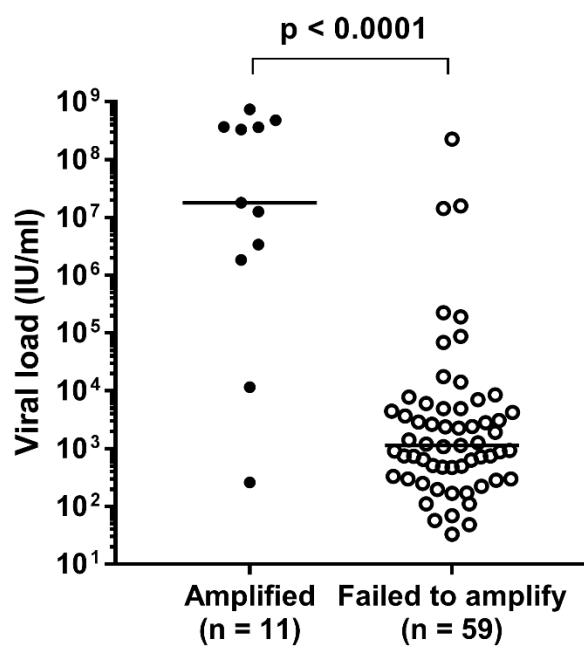

690

691 **Figure 2. HBV viral load of DSS from Iraq.** Successful PCR amplification of HBV-positive DSS

692 samples from Iraq is associated with higher viral load (Mann-Whitney U test). Number of

693 samples in each group (n) is shown. PCRs for samples which failed to amplify were

694 performed at least 3 times.

695

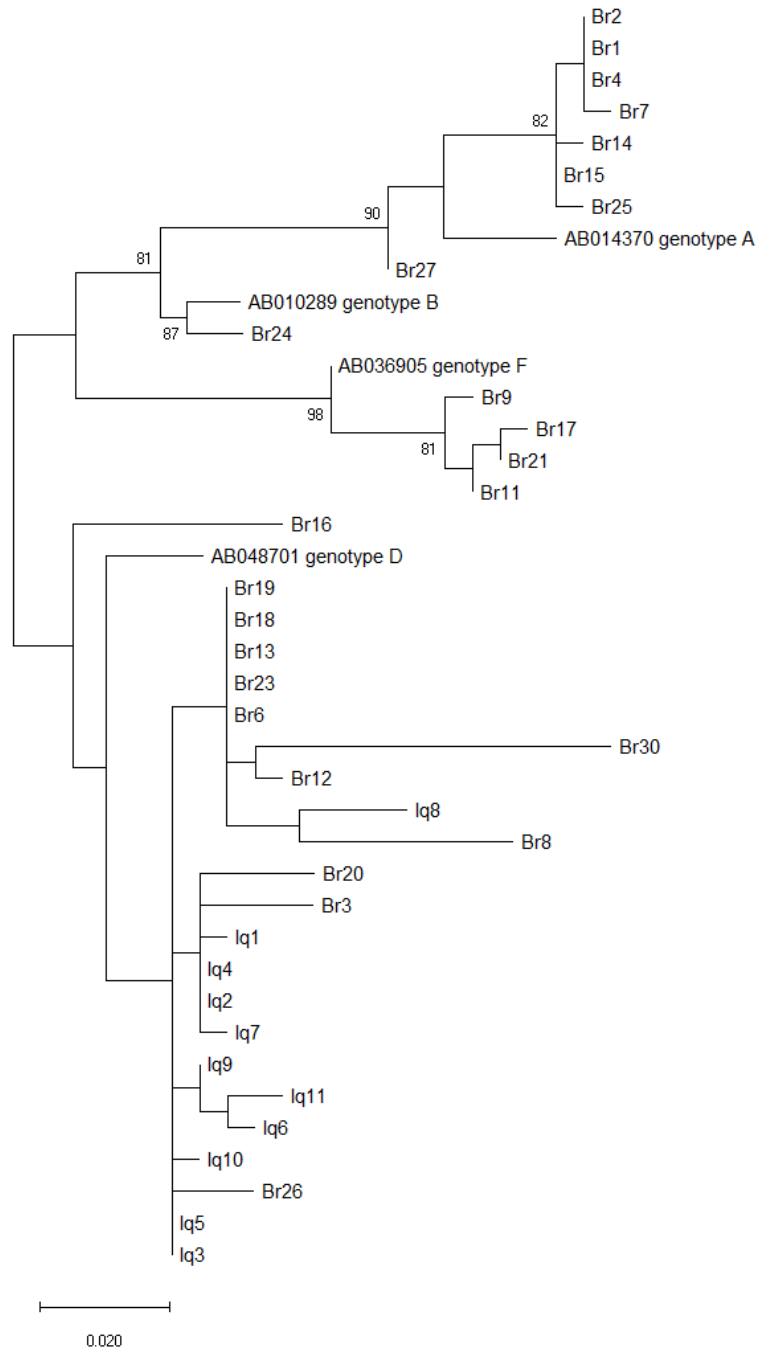

696

697 **Figure 3: Maximum likelihood (ML) tree constructed from F1+R1 PCR amplicon (240bp).**

698 The ML tree was inferred using a general time reversible model within MEGA X (11).

699 Statistical robustness was assessed using bootstrap resampling of 1,000 pseudoreplicates,

700 and the tree with the highest log-likelihood is shown.

701  
702  
703

704

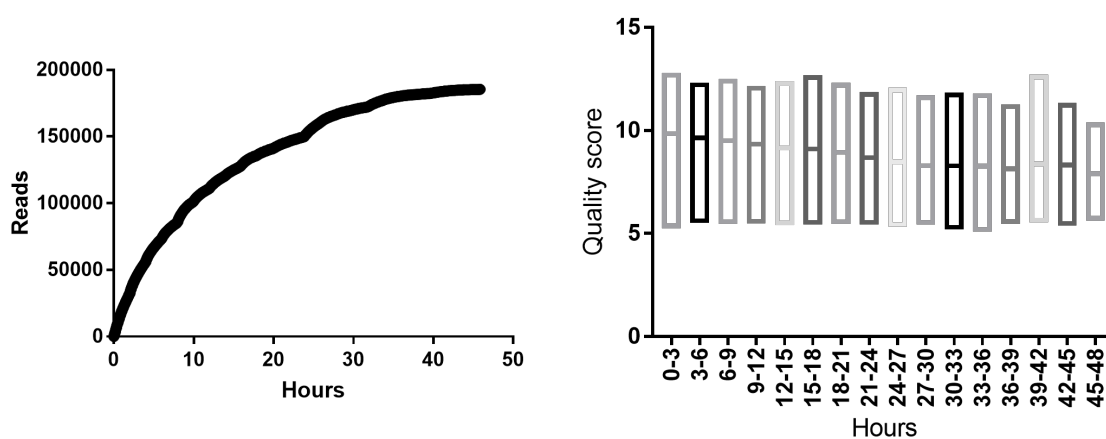

705

706 **Figure 4. Metrics from MinION sequencing run.** Both plots were generated from raw reads  
707 assigned barcodes by Albacore without further filtering. Quality scores are standard Phred  
708 scores produced by Albacore during basecalling, data is presented as mean Phred score per  
709 read with min and max.

710

## Workflow for sequencing from DSS

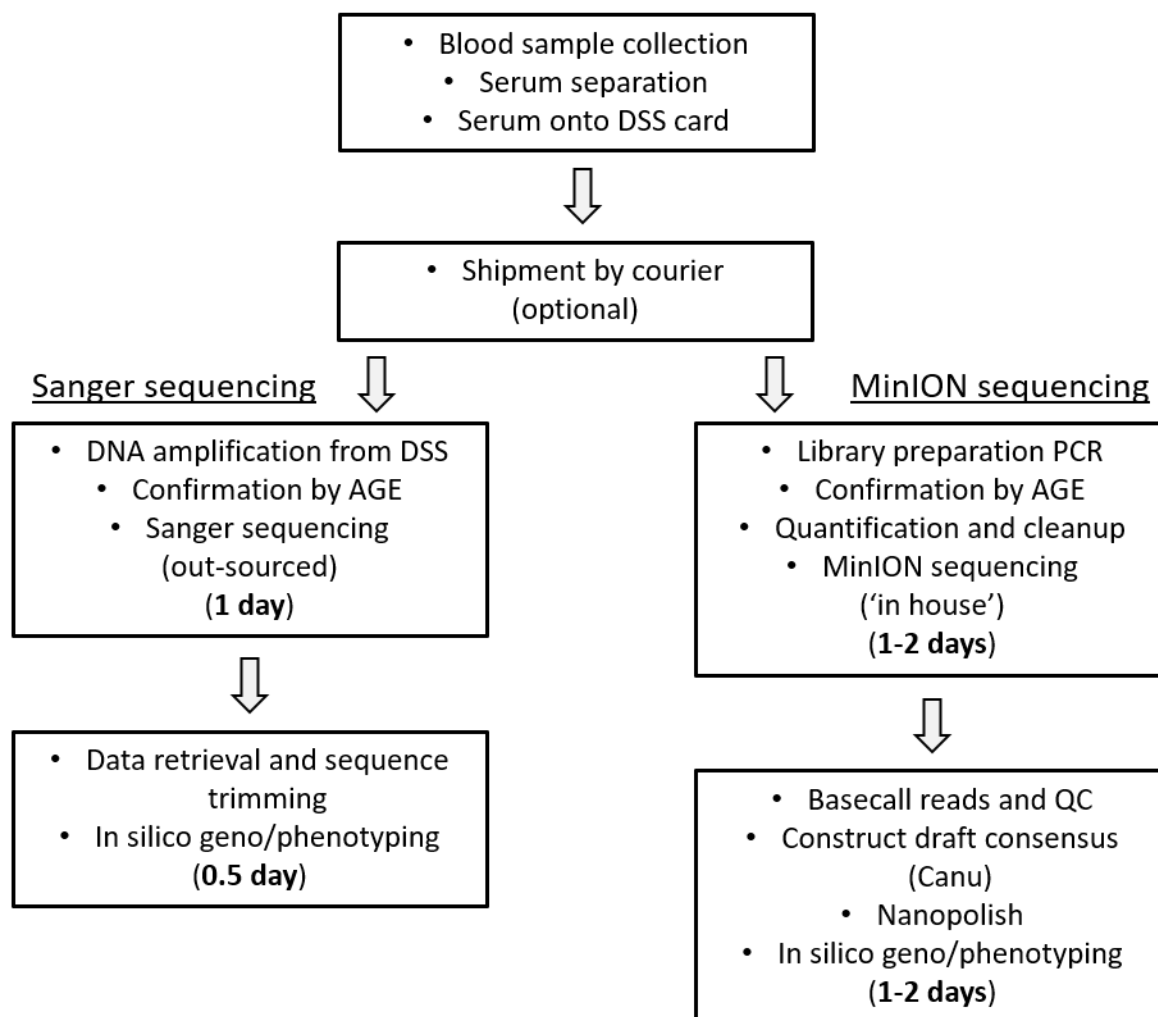

711

712 **Figure 5. Schematic of the sequencing workflows.** The typical number of days taken for  
713 each aspect of the workflow is noted. The length of time given to the ‘shipment by courier’  
714 and Sanger sequencing steps are relevant to this study but may be omitted, or vary  
715 significantly, depending upon the given laboratory and infrastructure situation. 1 day is  
716 suggested as the minimum amount of time for MinION library preparation, sample clean up  
717 and enough sequencing time to generate a reliable consensus. Sequencing to a greater  
718 depth will add more sequencing and subsequent compute time. Sanger sequencing in  
719 Nottingham is provided by a commercial service with sample collection and over-night

720 sequencing and data return. DSS, dried serum spot; AGE, agarose gel electrophoresis; QC,

721 quality control.

722

723
